# Supplementary material
Source: Springer Nature journal article supplement (https://www.springermedizin.de/resource/supplementary/12908_2009_90_MOESM2_ESM.pdf/9525118)

## Mean NRS pain score by treatment group by day

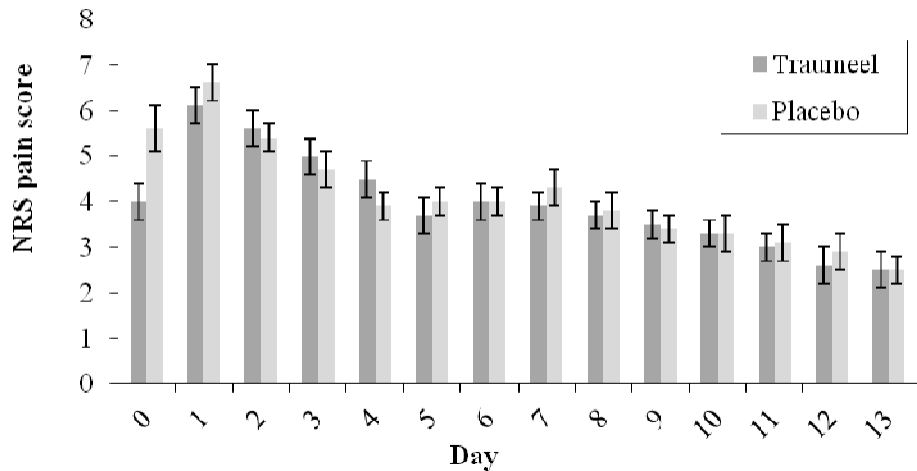

Supplement: MOESM2 [file 9525118]
